# Supplementary material
Source: Springer Nature journal article supplement (https://www.springermedizin.de/resource/supplementary/12943_2014_1416_MOESM11_ESM.pdf/9552944)
Supplement: MOESM11 [file 9552944]

Similarity to the DEK binding pattern

**A**

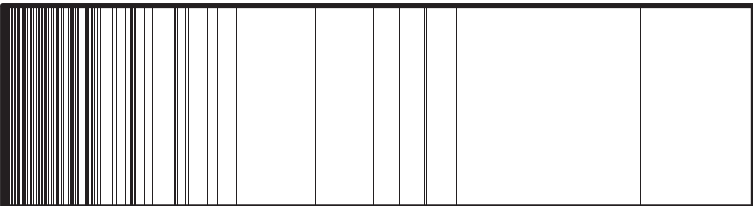

RNA PolymeraseII binding patterns (black) among all binding pattern sin Encode ordered from most similar (left) to least similar (right)to the binding pattern of DEK

**B**

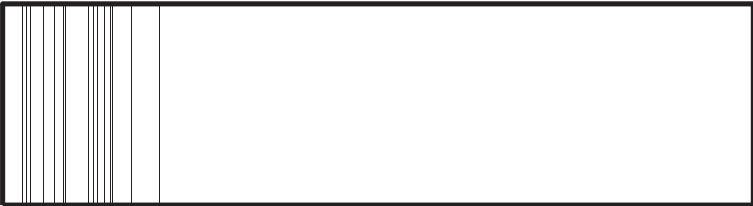

Open Chrom Synth binding patterns (black) among all binding pattern sin Encode ordered from most similar (left) to least similar (right) to the binding pattern of DEK
